# Supplementary material
Source: publisher site journal article supplement (https://static.cambridge.org/content/id/urn:cambridge.org:id:article:S0317167119003354/resource/name/S0317167119003354supp001.docx)
Supplement: Supplementary file 1 [file S0317167119003354supp001.docx]

**Supplementary Table 1 Administrative data sources**

| **Database** | **Full database name** | **Description** |
| --- | --- | --- |
| DAD | Discharge Abstract Database | Inpatient hospitalization data |
| NACRS | National Ambulatory Care Reporting System | Emergency department data |
| NRS | National Rehabilitation Reporting System | Rehabilitation data |
| CCRS-LTC | Continuing Care Reporting System Long-Term Care | Nursing home data |
| OHIP | Ontario Health Insurance Plan | Outpatient physician billings |
| PCCF | Postal Code Conversion File | Location of residence |
| RPDB | Ontario Registered Persons Database | Demographics and mortality data |
| HCD | Home Care Database | Home care data |

**Supplementary Table 2 Care trajectories between discharge from acute care and admission to nursing home by sex (n=4,831)**

| **Care trajectories** | **Women**  **n=2,946** | **Men**  **n=1,885** | **S-Diff** |
| --- | --- | --- | --- |
| Acute care length of stay  Median days (IQR) | 21 (11-46) | 23 (12-55) | 0.11 |
| Inpatient rehabilitation admission | 1,068 (36.3%) | 778 (41.3%) | 0.1 |
| Median length of stay (IQR) | 44 (30-63) | 51 (34-73) | 0.22 |
| Mean days per 30 patient-days ± SD | 7.06 ± 10.96 | 8.25 ± 11.57 | 0.11 |
| Complex continuing care admission | 745 (25.3%) | 497 (26.4%) | 0.02 |
| Median length of stay (IQR) | 59 (33-96) | 66 (33-102) | 0.11 |
| Mean days per 30 patient-days | 5.57 ± 10.61 | 5.69 ± 10.60 | 0.01 |
| Home-care use after acute care discharge | 949 (32.2%) | 571 (30.3%) | 0.04 |
| Median number of visits (IQR) | 62 (23-126) | 58 (13-117) | 0.09 |
| Means number of visits per 30 patient-days ± SD | 13.25 ± 29.34 | 10.94 ± 28.16 | 0.08 |
| Median delay from stroke discharge to nursing home admission in days (IQR) | 48 (0-96) | 61 (0-107) | 0.13 |
| All-cause readmission (between acute care discharge to nursing home admission) | 516 (17.5%) | 347 (18.4%) | 0.02 |

IQR: interquartile range, SD: standard deviation, S-Diff: standardized differences
Standardized differences of < 0.1 indicate adequate balance.

**Supplementary Table 3 Unadjusted prevalence ratios and 95% confidence intervals for health services care needs comparing women to men in the overall cohort and stratified by age, marital status, and baseline living situation (n=4,831)**

|  | **Extensive supervision for ADL** | **Symptoms of depression** | **Cognitive impairment** | **Aggressive behaviour** | **Lower social engagement** | **Pain** | **Higher health instability** | **Frail** |
| --- | --- | --- | --- | --- | --- | --- | --- | --- |
| **Overall** | 1.04  (1.01, 1.06) | 1.25  (1.11, 1.40) | 1.04  (1.00, 1.07) | 0.87  (0.80, 0.94) | 1.04  (0.91, 1.19) | 1.21  (1.13, 1.30) | 1.45  (1.28, 1.66) | 1.14  (1.08, 1.19) |
| **Age** |  |  |  |  |  |  |  |  |
| 18-64 | 1.15  (1.02, 1.30) | 1.51  (1.01, 2.26) | 1.01  (0.84, 1.21) | 0.78  (0.56, 1.08) | 0.99  (0.70, 1.40) | 1.28  (1.05, 1.55) | 1.95  (1.15, 3.29) | 1.26  (0.99, 1.60) |
| 65-74 | 1.04  (0.97, 1.11) | 1.19  (0.89, 1.59) | 1.03  (0.93, 1.14) | 0.73  (0.59, 0.92) | 1.30  (0.96, 1.76) | 1.21  (1.03, 1.42) | 1.40  (0.99, 1.97) | 1.16  (1.02, 1.33) |
| 75-84 | 0.98  (0.94, 1.02) | 1.15  (0.96, 1.39) | 0.99  (0.94, 1.05) | 0.84  (0.74, 0.96) | 1.14  (0.90, 1.44) | 1.20  (1.07, 1.34) | 1.33  (1.07, 1.66) | 1.04  (0.96, 1.13) |
| 85+ | 1.02  (0.98, 1.06) | 1.37  (1.10, 1.69) | 0.97  (0.92, 1.02) | 0.94  (0.81, 1.07) | 1.09  (0.86, 1.38) | 1.33  (1.17, 1.52) | 1.32  (1.07, 1.62) | 1.05  (0.97, 1.13) |
| **Marital status** |  |  |  |  |  |  |  |  |
| Married | 1.05  (1.01, 1.09) | 1.24  (1.02, 1.51) | 1.02  (0.96, 1.08) | 0.80  (0.69, 0.93) | 1.11  (0.88, 1.40) | 1.31  (1.17, 1.46) | 1.28  (1.04, 1.58) | 1.10  (1.02, 1.19) |
| Not married* | 1.07  (1.03, 1.11) | 1.28  (1.09, 1.51) | 1.06  (1.01, 1.11) | 0.90  (0.80, 1.00) | 0.97  (0.82, 1.15) | 1.16  (1.06, 1.27) | 1.64  (1.36, 1.98) | 1.22  (1.14, 1.31) |
| **Baseline living situation** |  |  |  |  |  |  |  |  |
| Alone | 1.05  (0.97, 1.13) | 1.40  (1.07, 1.84) | 1.02  (0.93, 1.13) | 1.02  (0.84, 1.25) | 0.74  (0.56, 0.98) | 1.23  (1.06, 1.44) | 1.61  (1.16, 2.23) | 1.23  (1.07, 1.42) |
| Not alone | 1.04  (1.02, 1.07) | 1.20  (1.05, 1.37) | 1.06  (1.02, 1.10) | 0.85  (0.78, 0.93) | 1.12  (0.96, 1.30) | 1.22  (1.12, 1.32) | 1.41  (1.22, 1.64) | 1.14  (1.08, 1.20) |

*Includes patients who were widowed, divorced, separated, never married, and unknown status

**Supplementary Table 4 Baseline characteristics by sex in the propensity matched cohort (n=2,728)**

| **Baseline characteristics** | **Women**  n=1,364 | **Men**  n=1,364 | **S-Diff** |
| --- | --- | --- | --- |
| Median age (IQR) | 81 (74-87) | 81 (73-86) | 0.01 |
| Age categories |  |  |  |
| 18-64 years | 129 (9.5%) | 135 (9.9%) | 0.01 |
| 65-74 years | 243 (17.8%) | 262 (19.2%) | 0.04 |
| 75-84 years | 539 (39.5%) | 514 (37.7%) | 0.04 |
| 85+ years | 453 (33.2%) | 453 (33.2%) | 0 |
| Married | 572 (41.9%) | 601 (44.1%) | 0.04 |
| Living alone at baseline | 268 (19.6%) | 247 (18.1%) | 0.04 |
| Baseline home location |  |  |  |
| Small town (<10,000) | 181 (13.3%) | 188 (13.8%) | 0.02 |
| Medium urban (10,000 to 100,000) | 158 (11.6%) | 165 (12.1%) | 0.02 |
| Large urban (>100,000) | 1,025 (75.1%) | 1,011 (74.1%) | 0.02 |
| Neighbourhood Income Quintile |  |  |  |
| 1 = Lowest | 344 (25.4%) | 324 (23.8%) | 0.04 |
| 2 = Next to lowest | 283 (20.9%) | 293 (21.6%) | 0.02 |
| 3 = Middle | 270 (19.9%) | 276 (20.3%) | 0.01 |
| 4 = Next to highest | 231 (17.0%) | 245 (18.0%) | 0.03 |
| 5 = Highest | 227 (16.8%) | 221 (16.3%) | 0.01 |
| Baseline comorbidities |  |  |  |
| Diabetes | 598 (43.8%) | 582 (42.7%) | 0.02 |
| Hypertension | 1,260 (92.4%) | 1,264 (92.7%) | 0.01 |
| Prior stroke | 232 (17.0%) | 226 (16.6%) | 0.01 |
| Atrial fibrillation | 482 (35.3%) | 521 (38.2%) | 0.06 |
| Ischemic heart disease | 433 (31.7%) | 441 (32.3%) | 0.01 |
| COPD | 412 (30.2%) | 405 (29.7%) | 0.01 |
| Congestive heart failure | 328 (24.0%) | 353 (25.9%) | 0.09 |
| Dementia | 537 (39.4%) | 542 (39.7%) | 0.03 |
| Charlson score categories |  |  |  |
| 0 | 213 (15.6%) | 199 (14.6%) | 0.03 |
| 1 | 169 (12.4%) | 198 (14.5%) | 0.06 |
| 2 | 314 (23.0%) | 297 (21.8%) | 0.03 |
| 3+ | 668 (49.0%) | 670 (49.1%) | 0 |
| Stroke type |  |  |  |
| Ischemic Stroke | 1,188 (87.1%) | 1,179 (86.4%) | 0.02 |
| Hemorrhagic Stroke | 176 (12.9%) | 185 (13.6%) | 0.02 |
| Acute care length of stay  Median days (IQR) | 21 (10-49) | 23 (12-52) | 0.09 |
| Inpatient rehabilitation admission | 569 (41.7%) | 547 (40.1%) | 0.03 |
| Median length of stay (IQR) | 47 (31-65) | 50 (34-72) | 0.14 |
| Mean days per 30 patient-days ± SD | 8.12 ± 11.42 | 8.02 ± 11.44 | 0.01 |
| Complex continuing care admission | 364 (26.7%) | 364 (26.7%) | 0 |
| Median length of stay (IQR) | 63 (33-101) | 65 (31-101) | 0.03 |
| Mean days per 30 patient-days | 5.64 ± 10.54 | 5.82 ± 10.72 | 0.02 |
| Home-care use after acute care discharge | 409 (30.0%) | 418 (30.6%) | 0.01 |
| Median number of visits (IQR) | 62 (22-135) | 61 (17-113) | 0.1 |
| Means number of visits per 30 patient-days ± SD | 11.26 ± 27.71 | 11.79 ± 30.15 | 0.02 |
| Median delay from stroke discharge to nursing home admission in days (IQR) | 57 (0-107) | 57 (0-102) | 0.01 |
| All-cause readmission (between acute care discharge to nursing home admission) | 257 (18.8%) | 251 (18.4%) | 0.01 |
| Care needs at nursing home admission |  |  |  |
| Extensive supervision for activities of daily living | 1,140 (83.6%) | 1,164 (85.3%) | 0.05 |
| Presence of symptom of depression | 281 (20.6%) | 269 (19.7%) | 0.02 |
| Presence of cognitive impairment | 997 (73.1%) | 1,006 (73.8%) | 0.01 |
| Presence of aggressive behavior | 471 (34.5%) | 474 (34.8%) | 0 |
| Lower social engagement | 236 (17.3%) | 225 (16.5%) | 0.02 |
| Presence of pain | 604 (44.3%) | 587 (43.0%) | 0.03 |
| Instability in health status | 240 (17.6%) | 233 (17.1%) | 0.01 |
| Frail | 780 (57.2%) | 790 (57.9%) | 0.01 |

IQR: interquartile range, SD: standard deviation, S-Diff: standardized differences, COPD: Chronic Obstructive Pulmonary Disease

Standardized differences of < 0.1 indicate adequate balance.
